1 Title: Temperature-induced transcriptional responses of the deep-biosphere bacterium,  
2 *Kosmotoga olearia*, illuminate its adaptation to growth from 20°C to 79°C

3 Running title: Transcriptional response to temperature in *K. olearia*

4 Stephen M. J. Pollo<sup>a</sup>, Abigail A. Adebusuyi<sup>a\*</sup>, Timothy J. Straub<sup>b</sup>, Julia M. Foght<sup>a</sup>, Olga  
5 Zhaxybayeva<sup>b,c</sup> and Camilla L. Nesbø<sup>a,d#</sup>

6  
7 <sup>a</sup>Department of Biological Sciences, University of Alberta, Edmonton, Alberta, Canada

8 <sup>b</sup>Department of Biological Sciences, Dartmouth College, Hanover, NH, USA

9 <sup>c</sup>Department of Computer Science, Dartmouth College, Hanover, NH, USA

10 <sup>d</sup>Centre for Ecological and Evolutionary Synthesis, Department of Biology, University of Oslo,  
11 Oslo, Norway

12

13 # Address correspondence to nesbo@ualberta.ca

14 \*Current address: Centre for Research & Innovation, Grande Prairie Regional College, Grande  
15 Prairie, AB

16

17 Word count for the abstract: 245 + 138 Word count for the text: 6055

18 **Abstract**

19 Temperature is one of the defining parameters of an ecological niche, and ambient temperature  
20 change is a physiological challenge faced by all living cells. Most organisms are adapted to  
21 growing within a temperature range that rarely exceeds  $\sim 30^{\circ}\text{C}$ , but the anaerobic thermophilic  
22 bacterium *Kosmotoga olearia* is capable of growing over an extremely wide temperature range  
23 ( $20^{\circ}\text{C} - 79^{\circ}\text{C}$ ). To pinpoint genomic determinants of this flexible phenotype, we compared  
24 transcriptomes of *K. olearia* cultures grown at its optimal  $65^{\circ}\text{C}$  to those at  $30^{\circ}\text{C}$ ,  $40^{\circ}\text{C}$ , and  
25  $77^{\circ}\text{C}$ . We found that changes in temperature significantly affect expression of 573 of 2,224 *K.*  
26 *olearia* genes. At different temperatures *K. olearia* remodels its metabolism dramatically, with  
27 increased expression of genes involved in energy and carbohydrate metabolism at high  
28 temperatures and up-regulation of amino acid metabolism at lower temperatures. At sub-optimal  
29 temperatures, many transcriptional changes were similar to those observed in mesophilic bacteria  
30 at physiologically low temperatures, including up-regulation of genes encoding enzymes for fatty  
31 acid synthesis, typical cold stress genes, and ribosomal proteins. In comparison to other  
32 Thermotogae, *K. olearia* has multiple copies of some cold-associated genes, suggesting that an  
33 increase in gene copy number is a strategy for cold adaptation. Many of these cold response  
34 genes are predicted to be laterally acquired, highlighting the role of gene exchange in bacterial  
35 thermoadaptation. Notably, at  $77^{\circ}\text{C}$  one third of the up-regulated genes encode proteins with  
36 hypothetical functions, indicating that many features of adaptations to high temperature growth  
37 are still unknown.

38

39 **Importance**

40 The subsurface is arguably the largest habitat on Earth, and insights into the composition,  
41 adaptation, and evolution of its microbial communities is likely to advance our knowledge of the  
42 biosphere and of global element cycling. Some subsurface systems, such as oil reservoirs, are  
43 thought to be so stable that any changes in environmental conditions, including temperature,  
44 occur over thousands of years. Yet a member of the oil reservoir microbial communities, the  
45 bacterium *Kosmotoga olearia*, is capable of growing over a range of 59°C. Our finding of  
46 coordinated temperature-specific gene expression patterns, and by extension temperature specific  
47 metabolism, suggests that *Kosmotoga* populations encounter variable environments, probably  
48 through migration. This raises the question: are deep subsurface microbial communities more  
49 dynamic than currently perceived? The large number of identified temperature-responsive genes  
50 also indicates that temperature response is a complex polygenic trait.

51

52

## 53 **Introduction**

54 Microorganisms are capable of growing over an impressive temperature range, at least from -  
55 15°C to 122°C (1, 2), and temperature is one of the most important physical factors determining  
56 their distribution, diversity, and abundance (3). However, individual microbial species grow only  
57 within a much narrower temperature interval. For example, *Escherichia coli* O157:H7 thrives in  
58 the laboratory between 19°C and 41°C (4), while *Geobacillus thermoleovorans* has a growth  
59 range of 37°C to 70°C (5). Microorganisms with temperature ranges >50°C are rare, and  
60 research into the few with ranges >40°C has focused on psychrophiles (e.g., (2)). *Kosmotoga*  
61 *olearia* TBF 19.5.1 (hereafter referred to as *K. olearia*) is an anaerobic thermophile from the  
62 bacterial phylum Thermotogae with a growth range that spans almost 60°C (6). How does this  
63 lineage achieve such physiological flexibility and what are the evolutionary advantages and  
64 implications of having this capability?

65         Fluctuations in temperature induce broad physiological changes in cells, including  
66 alterations to cell wall and membrane composition, translation, and energy metabolism (3, 7, 8).  
67 These physiological changes can be classified into two broad types of cellular response. Cold or  
68 heat *shock* designates the changes observed *immediately* after the shift of a culture to a lower or  
69 higher temperature, while *prolonged growth* at a specific lower or higher temperature elicits an  
70 *acclimated* low- or high-temperature response (7). Most studies on prokaryotes have focused on  
71 temperature shock responses. Among the Thermotogae, responses to both heat shock and  
72 prolonged growth at high temperatures have been studied in the hyperthermophile *Thermotoga*  
73 *maritima*, which can grow between 55°C and 90°C (9, 10). During prolonged high temperature  
74 growth *T. maritima* strongly up-regulates central carbohydrate metabolism genes and expresses a  
75 few typical heat shock protein genes (10). Little is known about how *T. maritima* responds to

76 sub-optimal temperatures, although it encodes some genes implicated in cold shock response.  
77 For example, its family of cold shock proteins (Csp), which are nucleic acid chaperones known  
78 to be induced during cold shock and cold acclimation in mesophilic bacteria (7, 11), exhibits  
79 nucleic acid melting activity at physiologically low temperatures (12). Similarly, responses to  
80 cold shock in a few other thermophiles involve many of the genes implicated in mesophiles' cold  
81 shock response (e.g., (13, 14)). In this study we systematically assess bacterial physiological  
82 changes associated with response to prolonged growth at both high and low temperature using *K.*  
83 *olearia* as a model system.

84 The *K. olearia* genome (NC\_012785) has 2,302,126 bp and is predicted to encode 2,224  
85 genes (15). Within the Thermotogae, genome size, intergenic region size, and number of  
86 predicted coding regions correlate with the optimal growth temperature of an isolate (16), with  
87 hyperthermophilic Thermotogae genomes being the most compact. Phylogenetically, the  
88 Thermotogae order Kosmotogales comprises the genera *Kosmotoga* and *Mesotoga* spp., the latter  
89 being the only described mesophilic Thermotogae lineage (8). Assuming a hyperthermophilic  
90 last common ancestor of the Thermotogae (17), the Kosmotogales can be hypothesized to have  
91 acquired wide growth temperature tolerance secondarily by expanding its gene repertoire.  
92 Moreover, it is likely that the ability of the Kosmotogales common ancestor to grow at low  
93 temperatures made the evolution of mesophily in *Mesotoga* possible (8).

94 Such adaptations of lineages to new environments can be greatly facilitated by lateral  
95 gene transfer (LGT), since genes already "adapted" to the new conditions are readily available in  
96 the microbial communities of the new environment (18). For instance, LGT has been implicated  
97 in adaptation to high temperature growth in hyperthermophilic bacteria, including *Thermotoga*  
98 spp., and to low temperature growth in Archaea (8, 18, 19). Genome analysis of the mesophilic

99 *Mesotoga prima* revealed that it laterally acquired 32% of its genes after it diverged from other  
100 Thermotogae lineages (16). Many of the predicted gene donors are mesophiles, supporting the  
101 importance of lateral acquisition of genes already adapted to mesophilic conditions in the  
102 evolution of *Mesotoga*.

103 To further gain insights into mechanisms of bacterial temperature response we sequenced  
104 17 transcriptomes from isothermal and temperature-shifted cultures of *K. olearia* and examined  
105 transcriptional differences at temperatures spanning its wide growth range. Additionally, through  
106 comparative genomic and phylogenetic analyses of identified temperature responsive genes and  
107 their homologs in two newly sequenced *Kosmotoga* isolates, as well as in genomes of other  
108 thermophilic and mesophilic Thermotogae, we investigated the importance of within-lineage  
109 evolution through LGT and gene duplication for adaptation of *K. olearia* to growth over a wide  
110 temperature range.

111

## 112 **Results and Discussion**

### 113 **Temperature shifts and isothermic conditions elicit different growth patterns in *K. olearia*.**

114 Under laboratory conditions in liquid anaerobic medium we observed growth of *K. olearia* at  
115 temperatures as low as 25°C and as high as 79°C, with optimal growth at 65°C (Fig. 1 and Fig.  
116 S1 in the supplemental material). Using a non-linear regression model (20) we estimate a  
117 growth-permissive temperature range of 20.2 – 79.3°C, consistent with the previously reported  
118 wide growth range of this isolate (6). Interestingly, we were not able to cultivate *K. olearia* at  
119 temperatures near its range boundaries (30°C and 77°C) by direct transfer from 65°C cultures.  
120 Instead, the growth temperature had to be changed sequentially in  $\leq 10^\circ\text{C}$  increments. Particularly

121 at the extremes, even small temperature shifts caused both a longer lag phase and a slower  
122 growth rate compared to isothermal cultures (Fig. 1 and Fig. S1 in the supplemental material).  
123 This phenomenon has also been noted for mesophilic bacteria, especially for transitions from  
124 high to low temperature (21). Our observations suggest that cells shifted to a new temperature  
125 need to undergo large physiological changes that require time (i.e. an ‘acclimation’ period (7))  
126 and that these physiological challenges are too great to overcome when temperature changes are  
127 large. To illuminate *K. olearia*'s transcriptional responses to changes in temperature we  
128 sequenced 17 transcriptomes of replicate mid- to late-log cultures grown isothermally at 30°C,  
129 40°C, 65°C, and 77°C, and of two 30°C cultures shifted to 25°C and 4°C (see Table S1 in  
130 Dataset S1 and Text S1 in the supplemental material).

131 **Architecture of the *K. olearia* transcriptome.** Analysis of transcription start and stop  
132 sites predicted a minimum of 916 transcriptional units (TU) in *K. olearia* (Text S1 and Table S2  
133 in Dataset S1 in the supplemental material), 52% of which consist of a single gene. This fraction  
134 of single-gene TUs lies between the 43% recorded for *T. maritima*, which has been shown to  
135 have a streamlined genome and a low-complexity transcriptome (22), and the 65% reported for  
136 *E. coli* (23). The average TU length of ~2.39 genes in *K. olearia* is less than the 3.3 genes per  
137 transcript of *T. maritima* (22) but closer to 2.2 genes per transcript in the mesophilic firmicute  
138 *Geobacter sulfurreducens* (24) and 1-2 genes per transcript in Bacteria in general (e.g. (23)).  
139 Given that the *K. olearia* genome has more intergenic DNA than *T. maritima*'s genome (the ratio  
140 of the nucleotides located in non-coding vs. coding regions is 0.13 in *K. olearia* and 0.06 in *T.*  
141 *maritima*), the shorter TU lengths in *K. olearia* may point to more flexible transcriptional  
142 regulation and may be linked to *Kosmotoga*'s ability to grow under more variable conditions.

143           **Consistent energy generation across different temperature conditions.** *K. olearia*  
144 produces ATP from pyruvate using a biochemically well-understood fermentation pathway that  
145 generates hydrogen, carbon dioxide and acetate ((6); Fig. 2 and data not shown). Given that  
146 pyruvate was the carbon and energy source in all experiments, we surveyed 51 genes predicted to  
147 be involved in pyruvate catabolism and identified 15 genes with consistently high expression in  
148 all temperature treatments (Fig. 2 Table S3 in Dataset S1 in the supplemental material). In  
149 addition to indirectly validating the previously known functional annotations of these genes, we  
150 furthermore propose that genes Kole\_1509 – 1513 encode a pyruvate ABC transporter (Fig. 2).  
151 Their current annotation as a peptide ABC transporter may be erroneous since most of the  
152 peptide ABC transporters predicted in *T. maritima* using bioinformatics have been shown instead  
153 to bind and transport sugars (25). Our findings also indicate that the enzymes involved in the  
154 pyruvate fermentation pathway are versatile enzymes that are expressed and are capable of  
155 functioning across an extremely wide temperature range.

156           **Identification of temperature-related transcriptional responses in *K. olearia*.** Based  
157 on hierarchical clustering, transcriptome replicates at the same temperature group together (Fig.  
158 S2 and Text S1 in the supplemental material), suggesting that the observed changes in  
159 transcription are due to the culture growth temperature. Principal Component Analysis (PCA)  
160 clearly separated the transcriptomes into quadrants corresponding to optimal (65°C),  
161 intermediate (40°C), low (30°C, 25°C and 4°C) and high (77°C) growth temperatures (Fig. 3).  
162 Several genes with a high correlation between their expression level and a specific growth  
163 temperature (vectors in Fig. 3, Table S4 in Dataset S1 in the supplemental material) are known to  
164 be involved in temperature response. For example, expression of the protease Kole\_1599  
165 positively correlated with the 77°C transcriptomes, where high expression of proteases was



166 expected based on their involvement in heat shock response in *T. maritima* (9). Similarly,  
167 expression of the cold shock protein genes Kole\_0109 and Kole\_2064 positively correlated with  
168 low temperature growth. Lastly, some observed changes presumably were due to the expected  
169 decreased metabolic activity of the culture at a non-optimal temperature. This can be exemplified  
170 by the high expression and strong correlation of the central carbon metabolism gene  
171 glyceraldehyde-3-phosphate dehydrogenase (Kole\_2020) with the 65°C transcriptomes. Overall,  
172 the observed differential expression of known temperature-responsive genes implies that the  
173 remaining detected transcriptional changes also likely reflect temperature-related trends in gene  
174 expression.

175 **Detailed analysis of changes in gene expression in response to prolonged growth at**  
176 **different temperatures.** Putative temperature-responsive genes were identified by pairwise  
177 comparisons of each isothermic temperature treatment to the optimal growth at 65°C (i.e., 30°C  
178 vs 65°C, 40°C vs 65°C, and 77°C vs 65°C). Across all comparisons 573 genes fulfilled our  
179 criteria for temperature responsiveness (i.e.,  $\geq 2$ -fold difference in expression,  $> 20$  reads per  
180 transcript, False Discovery Rate  $< 0.05$ ) with 430, 115, and 169 genes detected in the 30°C vs  
181 65°C, 40°C vs 65°C, and 77°C vs 65°C comparisons respectively (Table S5 in Dataset S1 in the  
182 supplemental material). Most of these genes were up-regulated (Fig. S3 in the supplemental  
183 material) with the exception of down-regulation of many genes involved in carbohydrate and  
184 energy metabolism at 30°C (Clusters of Orthologous Groups [COG] categories G and C). The  
185 latter probably reflects the very slow growth rate at this temperature. Curiously, despite the  
186 slower growth rate at 77°C, genes from COG C and G categories were over-represented and up-  
187 regulated at this temperature (Fig. 4 and Fig. S3 in the supplemental material; discussed in detail  
188 below).

189 In all transcriptomes the list of putative temperature-responsive genes was depleted of  
190 genes involved in translation (COG category J) and nucleotide metabolism (COG category F)  
191 (Fig. 4 and Fig. S3 in the supplemental material) and enriched in genes involved in replication,  
192 recombination and repair (COG category L, particularly at 30°C), and signal transduction (COG  
193 category T). Most of the identified COG category L genes are either mobile elements or  
194 CRISPR-associated proteins. Movement of mobile genetic elements is a common feature of  
195 stress responses (26) and the up-regulation of CRISPR-associated genes could therefore be a  
196 response to the proliferation of these elements. Differential expression of the signal transduction  
197 genes suggests the importance of these systems for regulating cellular responses at all tested  
198 temperatures. Additionally, at both 30°C and 77°C many genes encoding transcription regulators  
199 (COG category K, transcription) are up-regulated, suggesting that prolonged growth at sub- and  
200 supra-optimal temperatures results in detectable changes in transcriptional gene regulation in *K.*  
201 *olearia*. Below we discuss the identified temperature-responsive gene expression patterns in  
202 more detail.

203 **i) At 40°C there are pronounced differences in membrane fatty acid composition**  
204 **but no signs of cold stress.** Although the growth rate of *K. olearia* at 40°C is only one-third of  
205 that at the optimum 65°C (Fig. 1 and Fig. S1 in the supplemental material), clustering analysis  
206 suggested that the 40°C transcriptome was most similar to that at 65°C (Fig. 3 and Fig. S2 in the  
207 supplemental material). The slower growth rate was reflected by the four most highly expressed  
208 temperature responsive genes at 40°C showing significantly lower expression than at 65°C,  
209 including growth-related genes like the toga protein Kole\_1501 (Table S5 in Dataset S1 in the  
210 supplemental material). Yet, 94 of 115 putative temperature responsive genes were up-regulated

211 (Table S5 in Dataset S1 in the supplemental material), suggesting that slower metabolism is not  
212 the only explanation for the observed transcriptional response to growth at 40°C.

213 Lipid metabolism (COG category I) appears to be particularly important at 40°C. For  
214 instance, all of the predicted fatty acid synthesis genes showed the highest expression at 40°C  
215 (Table S5 in Dataset S1 and Fig. S4 in the supplemental material), with two genes involved in  
216 synthesis of unsaturated fatty acids (Kole\_0968) and initiation of fatty acid synthesis  
217 (Kole\_0969) having significantly higher expression. Biochemical analyses of total fatty acids at  
218 40°C and 65°C showed a much greater diversity of fatty acids at 40°C (Table S6 in Dataset S1 in  
219 the supplemental material), which may explain the higher demand for these genes at lower  
220 temperatures. Interestingly, at 40°C in particular there was increased expression of a phosphate  
221 ABC transporter (Kole\_0707 – Kole\_0711, Table S5 in Dataset S1 in the supplemental material),  
222 which may be linked to the increased production of polar membrane lipids at moderately low  
223 temperatures. Maintenance of a functional cell membrane is crucial for survival, and bacteria  
224 respond to changes in temperature by altering the membrane's fatty acid composition (27). The  
225 observation that lipid metabolism genes were among the highly expressed genes at low  
226 temperature, despite the lower growth rate, suggests that changes to the cell membrane  
227 composition are one of the most important adaptations for survival of *K. olearia* at lower  
228 temperatures.

229 Proper protein folding at a lower temperature is another physiological challenge that may  
230 require enzymatic assistance. For example, proline isomerization happens spontaneously at high  
231 temperatures, but at lower temperatures (e.g., 37°C) the reaction needs a catalyzing enzyme -  
232 peptidylprolyl isomerase (PPIase) (28). Not surprisingly, *K. olearia* has three temperature-  
233 responsive PPIase genes: two PpiC-type genes (Kole\_1682 and Kole\_0383) that are both highly

234 expressed at 40°C, and one FKBP-type gene (Kole\_1745), which shows high expression at all  
235 temperatures except 77°C (Table S5 in Dataset S1 in the supplemental material). These  
236 expression patterns suggest PPIase is particularly important at moderately low temperatures  
237 where the cells are still relatively active. However, the enzymes known to assist protein folding  
238 in cellular stress responses, chaperones (e.g., GroEL and Hsp) and protease Do, were  
239 significantly down-regulated at 40°C (Table S5 in Dataset S1 in the supplemental material).  
240 Among other typical cold stress related proteins, only one of *K. olearia*'s three cold shock  
241 proteins (Kole\_0109) showed significantly higher expression at 40°C and its up-regulation was  
242 merely moderate when compared to its expression levels at 30°C (Table S5 in Dataset S1 in the  
243 supplemental material). This overall lack of induction of typical stress-related genes, especially  
244 when compared to 30°C and 77°C (see below), suggests that 40°C is still within the "Goldilocks"  
245 temperature range for *K. olearia*.

246 **ii) *K. olearia* is in cold stress at 30°C.** Transcriptomes from 30°C, 25°C, and 4°C  
247 cultures were very similar to each other (Fig. 3 and Fig. S2 in the supplemental material).  
248 Overall, the gene expression differences observed at 30°C were even more pronounced at 25°C  
249 and 4°C (Table S5 in Dataset S1 in the supplemental material). However, due to adjustments in  
250 culture handling required to obtain enough biomass at lower temperatures (see Text S1 in the  
251 supplemental material), some gene expression patterns at 25°C and 4°C may be due to the cells  
252 either responding to fresh medium or displaying an immediate cold shock response. Therefore,  
253 we focused our further analyses on genes differentially expressed at 30°C, while the 25°C and  
254 4°C transcriptomes were used to confirm the patterns observed at 30°C.

255 Two of three Csp-encoding genes in *K. olearia* (Kole\_0109 and Kole\_2064, Table S5 in  
256 Dataset S1 in the supplemental material) were among the three most highly expressed up-

257 regulated genes at low temperatures, suggesting that the cells were in a cold-stressed state during  
258 growth at  $\leq 30^{\circ}\text{C}$ . Further support for this hypothesis comes from significant up-regulation of  
259 genes linked to bacterial cold response (7): a DEAD/DEAH -box RNA helicase (Kole\_0922),  
260 RbfA (Kole\_2103), and NusA (Kole\_1529). Hence, the thermophile *K. olearia* uses homologs of  
261 the cold response genes employed by mesophilic bacteria at physiologically low temperatures.

262         With decreasing temperature, we observed up-regulation of several ribosomal proteins  
263 (Fig. 3). Some (L10 (Kole\_1840) and L7/L12 (Kole\_1839)) have already been linked to both  
264 cold shock and prolonged low temperature growth responses in bacteria (e.g., (29)). The most  
265 dramatic differential expression, however, was observed for a ribosomal protein gene not yet  
266 connected to cold response (L34; Kole\_0258). L34, a bacteria-specific ribosomal protein  
267 hypothesized to be a relatively recent addition to the evolving ribosome (30), is required for  
268 proper ribosome formation (31). A *Bacillus subtilis* mutant lacking the L34 gene showed slow  
269 growth at low temperature (32), suggesting a role for L34 in this condition. Many ribosomal  
270 proteins are recruited for extra-ribosomal functions (33), hence some of the up-regulated  
271 ribosomal proteins may have alternative roles in response to low temperature that are unrelated  
272 to the ribosome itself. However, genes encoding ribosomal RNA (rRNA) methyltransferases,  
273 rmlH (Kole\_1718) and rmlL (Kole\_0897), were also significantly up-regulated, and methylation  
274 of rRNAs has been associated with responses to environmental stress, including temperature  
275 (34). Combined with observations that ribosomes need to be fine-tuned to function properly at  
276 low temperature (7), we hypothesize that *K. olearia* modifies its ribosome by changing  
277 stoichiometry of its components and by methylating rRNA. Time required for such ribosomal  
278 adjustments could also explain the longer lag phase following temperature shifts (Fig. S1 in the  
279 supplemental material).

280 To detect a decrease in environmental temperature and elicit an appropriate regulatory  
281 response, some bacteria have evolved two-component cold sensors (27). These signal  
282 transduction systems consist of a sensor, a membrane-integrated protein with a kinase domain  
283 that detects changes in the fluidity of the cell membrane, and the cytoplasmic response regulator,  
284 a protein that induces expression of cold-responsive genes. In *K. olearia*, a histidine kinase with  
285 two predicted transmembrane domains (Kole\_1017) and two response regulators (Kole\_1015  
286 and Kole\_1016) showed a steady increase in expression as temperatures decreased from 65°C,  
287 but no significant change in expression at 77°C (Table S5 in Dataset S1 in the supplemental  
288 material), leading us to hypothesize that these genes encode a cold-sensing two-component  
289 system.

290 **iii) Increased amino acid metabolism at sub-optimal temperatures.** At lower growth  
291 temperatures (and especially at and below 30°C) we observed an over-representation of genes  
292 involved in amino acid metabolism (COG category E). At 30°C, and to a lesser extent at 40°C, a  
293 peptide ABC transporter gene (Kole\_2046 – Kole\_2050) and several genes in the arginine  
294 (Kole\_0092 – Kole\_0097) and lysine (Kole\_0104 – Kole\_0107, 30°C only) biosynthesis  
295 pathways were up-regulated, suggesting the potential for accumulation of peptides and amino  
296 acids (or their intermediates) at lower temperatures. At 30°C there was also significant up-  
297 regulation of a citrate synthase gene (Kole\_1230). Intriguingly, in *Staphylococcus aureus* citrate  
298 was shown to accumulate during prolonged cold stress (29), which could also be the case for *K.*  
299 *olearia*. Alternatively, citrate synthase, together with isocitrate dehydrogenase (Kole\_1227), may  
300 be involved in converting pyruvate or acetyl-CoA to 2-oxoglutarate, a precursor for several  
301 amino acids including arginine. Accumulation of both arginine and lysine was observed during  
302 low temperature growth of *Clostridium botulinum*, where these amino acids were suggested to

303 act as compatible solutes (35). Interestingly, while the cells may accumulate peptides at 30°C, at  
304 40°C there was increased expression of an oligo-peptidase (Kole\_1190) and genes involved in  
305 lysine degradation (Kole\_0958, Kole\_0963 – Kole\_0966). Such distinguishably different  
306 metabolic responses to moderately low (40°C) and low ( $\leq 30^\circ\text{C}$ ) temperatures suggest a fine-  
307 tuned temperature-dependent peptide turnover.

308 Two paralogs of ornithine carbamoyl-transferase (*ArgF*; Kole\_1433 and Kole\_2071)  
309 showed significantly lower expression at both 40°C and 30°C. The amino acid ornithine is an  
310 intermediate of arginine synthesis and lower expression of *ArgF* suggests that ornithine, rather  
311 than arginine, may accumulate at sub-optimal temperatures. However, ornithine has also been  
312 implicated in biofilm formation and species cross-talk (36), suggesting a possible alternative role  
313 of this amino acid in cellular responses to low temperature. Our unpublished observation of  
314 increased clumping of *K. olearia* cells grown at 30°C indirectly supports this hypothesis.

315 Re-modelling of amino acid metabolism at low temperatures has also been observed in  
316 other bacteria (e.g., (35, 37)). Interestingly, the genome of *M. prima* encodes more genes  
317 involved in amino acid metabolism than the genomes of *K. olearia* and other Thermotogae (16).  
318 Perhaps the mesophilic *Mesotoga* spp. have adapted to the increased need for peptides by  
319 expanding existing and acquiring new amino acid metabolism gene families. Amino acid  
320 metabolism genes are also among the most numerous bacterial genes laterally acquired by  
321 mesophilic Archaea, which was hypothesized to reflect their adaptation to low temperature  
322 growth (19).

323 **iv) *K. olearia* is in heat stress at 77°C.** Both the multivariate (Fig. 3) and clustering (Fig.  
324 S2 in the supplemental material) analyses showed that the 65°C and 77°C transcriptomes are  
325 distinct. Since 77°C is almost the upper limit for *K. olearia* growth, we hypothesize that the

326 observed differences in expression profiles at 77°C reflect a cell-wide heat stress response. Of  
327 the 169 differentially expressed genes, 119 showed increased expression at 77°C (Table S5 in  
328 Dataset S1 in the supplemental material). Hypothetical proteins made up a sizeable fraction (41  
329 genes; 34%) of the 119 genes, indicating that adaptation to growth at sustained high temperature  
330 remains largely uncharacterized. Only one of the known heat shock response genes (9), the  
331 extreme heat stress sigma factor-24 (*rpoE*, Kole\_2150), was up-regulated. Among the most  
332 highly expressed genes were the structural RNAs *ffs* (Kole\_R0010), *ssrA* (Kole\_R0006), and  
333 *rnpB* (Kole\_R0049) (Fig. 3), suggesting an increased rate of RNA turnover at supra-optimal  
334 temperature. As mentioned earlier, carbohydrate and energy metabolism genes (COG category C  
335 and G) were also up-regulated. It is unclear, however, if the underlying cause is the increased  
336 turnover of enzymes at elevated temperatures, or a demand for more enzymes due to increased  
337 carbohydrate catabolism. Notably, two genes predicted to produce amino sugars for cell surface  
338 polysaccharides (Kole\_1281 and Kole\_1282) were also moderately up-regulated at 40°C,  
339 suggesting that cell surface polysaccharides may contribute to temperature adaptation at both  
340 sub- and supra-optimal temperatures. Increased carbohydrate metabolism in response to  
341 prolonged growth at supra-optimal temperature has been observed previously in *T. maritima* (10)  
342 and therefore may be a common adaptation to high temperature growth in the Thermotogae. The  
343 prolonged supra-optimal temperature growth of *T. maritima* also did not involve up-regulation of  
344 typical heat-shock response proteins (10). This highlights the difference between cellular  
345 response to an immediate heat-shock and to prolonged growth at supra-optimal temperature, and  
346 in general justifies classifying the cellular response to temperature into these two distinct  
347 categories.



348           **v) General stress response genes.** Since we hypothesize that at 77°C and 30°C *K.*  
349 *olearia* cells are under stress, genes that are significantly up-regulated at both temperatures are  
350 candidates for a general temperature-stress response. There are 25 such genes, three of which  
351 were also significantly up-regulated at 40°C (Table S5 in Dataset S1 in the supplemental  
352 material). Among the most highly expressed of the 25 genes were Kole\_2091, a gene with a  
353 distantly related homolog in only two other Thermotogae, and Kole\_0418, a gene that within the  
354 Thermotogae has homologs only in *Mesotoga* spp. Both genes encode proteins of unknown  
355 function. Given such limited distribution within the Thermotogae, these genes may be involved  
356 in *Kosmotoga*-specific adaptation to a wide growth temperature range.

357           **Conservation of *K. olearia*'s temperature-responsive genes across Kosmotogales.** All  
358 genes that are required for adaptation and response of *K. olearia* to a wide range of growth  
359 temperatures are expected to be present in other *K. olearia* isolates, whereas some may be absent  
360 from *Kosmotoga* species having a narrower spectrum of growth temperature. Therefore, we  
361 compared the *K. olearia* genome to the genomes of *Kosmotoga* sp. DU53 and *Kosmotoga*  
362 *arenicorallina* (38). *Kosmotoga* sp. DU53 has a similar growth temperature range (observed  
363 range 25°C - 79°C, Table S7 in Dataset S1 in the supplemental material) and >99% average  
364 nucleotide identity (ANI) when compared to *K. olearia*, while *K. arenicorallina* exhibits a  
365 narrower growth temperature range (observed range 35°C - 70°C, Table S7 in Dataset S1 in the  
366 supplemental material) and has only 84% ANI when compared to *K. olearia*.

367           Indeed, the *Kosmotoga* sp. DU53 genome lacks only 10 of the 573 *K. olearia* putative  
368 temperature-responsive genes (BLASTP and TBLASTN searches, E-value < 10<sup>-3</sup>, Table S5 in  
369 Dataset S1 in the supplemental material). All 10 genes were expressed in *K. olearia* at relatively  
370 low levels (the highest average expression value of 453 is for Kole\_0200 at 77°C), suggesting

371 that they are unlikely to be essential for high or low temperature growth. On the other hand, the  
372 *K. arenicorallina* genome does not have detectable homologs of 103 of the 573 putative  
373 temperature-responsive genes in *K. olearia* (BLASTP and TBLASTN searches, E-value  $< 10^{-3}$ )  
374 (Table S5 in Dataset S1 in the supplemental material). The list of absent genes includes several  
375 of the arginine and lysine biosynthesis genes that are up-regulated in *K. olearia* during growth at  
376  $\leq 30^{\circ}\text{C}$ , and seven of the hypothetical proteins up-regulated at  $77^{\circ}\text{C}$ . Therefore, we hypothesize  
377 that these 103 genes play a role in extending the growth range of *K. olearia* to  $\leq 35^{\circ}\text{C}$  and  $\geq 70^{\circ}\text{C}$ .

378 **Role of lateral gene transfer in thermoadaptation of *K. olearia*.** Obtaining "pre-  
379 adapted" genes from other genomes is one way prokaryotes adjust to new environmental  
380 conditions (18). Using HGTector (39) we predicted that 354 of *K. olearia*'s 2,118 protein coding  
381 genes have been acquired laterally by *K. olearia* or the Kosmotogales (i.e., *Kosmotoga* and  
382 *Mesotoga*), presumably representing LGT events occurring after the divergence of Kosmotogales  
383 from other Thermotogae (Table S8 in Dataset S1 in the supplemental material). Eighty-eight of  
384 the 354 genes were temperature responsive (Table S5 in Dataset S1, Fig. S5A and S5B in the  
385 supplemental material), including several already discussed highly expressed genes (Table 1 and  
386 Table S5 in Dataset S1 in the supplemental material). Notably, LGT appears to be especially  
387 important in *K. olearia*'s adaptation to the lower growth temperatures. Thirty-eight of the 88  
388 temperature-responsive laterally acquired genes are shared with the strictly mesophilic  
389 *Mesotoga*, and most of them were highly expressed at lower temperatures,  $30^{\circ}\text{C}$  in particular  
390 (Fig. S5C in the supplemental material). Among these are the previously discussed rRNA  
391 methyltransferases (Kole\_1718 and Kole\_0897). The fatty acid synthesis genes (Kole\_0969-  
392 Kole\_0973) that are up-regulated at  $40^{\circ}\text{C}$ , as well as their Kosmotogales and *Mesotoga*  
393 homologs, form a distantly related sister clade to other Thermotogae lineages (Fig. S6A in the

394 supplemental material), suggesting that these genes may have been acquired from an un-sampled  
395 lineage. Similarly, the Csp-encoding gene highly expressed at 30°C (Kole\_0109) is placed  
396 outside of the Thermotogae clade (Fig. S6B in the supplemental material). Predicted acquisition  
397 of the fatty acid synthesis and Csp genes by (now mesophilic) Archaea (19) additionally argues  
398 for the importance of these genes in adaptation to low temperature growth.

399         It is notable that some putative lateral acquisitions by *K. olearia* do not have homologs in  
400 *Mesotoga*. These include genes encoding the predicted cold temperature sensor (Kole\_1015 –  
401 Kole\_1017), one of the PPIase genes (Kole\_1745), as well as the canonical cold response  
402 enzyme DEAD/DEAH box RNA helicase (Kole\_0922). Lack of these genes in *Mesotoga*  
403 suggests their potential importance for *K. olearia*'s ability to grow over a wide temperature  
404 range.

405         **Role of gene family expansion and lineage-specific gene evolution in**  
406 **thermoadaptation.** Expansion of cold-responsive gene families may represent a common  
407 strategy for low temperature adaptation, as has been noted in many bacteria, especially in  
408 psychrophiles (e.g. (40)). *K. olearia* exhibits the same trend. For example, when compared to  
409 other Thermotogae, all three analyzed *Kosmotoga* genomes harboured more copies of Csp-  
410 encoding genes (Table S9 in Dataset S1 in the supplemental material). Additionally, *K. olearia*  
411 has extra homologs (Kole\_0111 and Kole\_0110) of the putative cold sensor system discussed  
412 above. The observed gene family expansions might be important not only for low temperature  
413 growth, but also for growth over a wide temperature interval. For example, *Mesotoga* functions  
414 with only a single Csp gene, demonstrating that having more copies of this gene is not required  
415 for low temperature growth. Having several copies of these genes, however, allow *K. olearia* the  
416 opportunity to regulate them differently at different temperatures. Similarly, the additional cold

417 sensor homologs do not show co-ordinated temperature response: Kole\_0110 is up-regulated at  
418 40°C, while Kole\_0111 is up-regulated at 77°C (Table 1). Therefore, these additional homologs  
419 may represent sensors tuned to different temperatures.

420           Gene family expansions can be achieved via within-lineage gene duplication or through  
421 LGT. A combination of these mechanisms appears to be at work in *K. olearia*, as demonstrated  
422 by the phylogenetic analyses of Csp genes (Fig. S6B in the supplemental material). Similarly,  
423 even though several Thermotogae genomes contain as many copies of PPIase genes as do  
424 *Kosmotoga* genomes (Table S9 in Dataset S1 in the supplemental material), phylogenetic  
425 analysis suggests that in the Kosmotogales this gene family has only recently been expanded by  
426 both LGT (the FKBP-type, Table 1) and duplication (the PpiC-type, Fig. S6C in the  
427 supplemental material).

428           However, the role of within-lineage evolution of specific genes in response to changing  
429 environmental conditions should not be neglected. For example, typical cold response genes  
430 RbfA (Kole\_2103) and NusA (Kole\_1529) were not laterally acquired, but nevertheless show  
431 high expression only at 30°C. Deciphering adaptive changes that occurred in such genes  
432 compared to thermophilic homologs may elucidate molecular mechanisms of low temperature  
433 adaptation.

434           **Why maintain the capacity for growth over such a wide temperature range?** Most  
435 bacteria are under selection to eradicate extraneous DNA (and genes) from their genomes (41),  
436 and among free-living bacteria Thermotogae in general have very compact genomes.  
437 Kosmotogales, however, have notably larger genomes than other thermophilic Thermotogae (8,  
438 16), raising the possibility that expanded genomes are advantageous in *K. olearia*'s habitat. As  
439 discussed above, many of the genes in *K. olearia*, such as the cold-sensor system, were

440 expressed only at specific sub- or supra-optimal temperatures, but do not seem to be important  
441 for growth at other temperatures (Table 1 and Table S5 in Dataset S1 in the supplemental  
442 material). The regulated response to low temperatures and the preservation of the laterally  
443 acquired genes specifically expressed at 40°C and 30°C suggest that *K. olearia* encounters  
444 environments with very different temperatures frequently enough to maintain these genes in its  
445 genome. Such environments may include oil reservoirs located at different depths, as well as  
446 marine sediments influenced by the mixing of cold deep sea water and hydrothermal fluids (42).  
447 As a result, this lineage was likely selected to become a temperature generalist. This conjecture  
448 is supported by the environmental conditions of the subsurface environments and marine  
449 hydrothermal vents from which *Kosmotoga* spp. have been isolated (6, 43, 44). *K. olearia* was  
450 isolated from a deep subsurface oil reservoir with *in situ* temperature of 68°C (6), but its 16S  
451 rRNA sequences also have been detected in many oil fields having *in situ* temperatures of 20°C–  
452 50°C (45). *Kosmotoga* sp. DU53, which is most similar to *K. olearia*, was isolated from an oil  
453 reservoir with an *in situ* temperature of ~50°C, while *K. arenicorallina* was isolated from  
454 hydrothermal sediments with a temperature of ~40°C (43). Notably, *K. olearia* was also  
455 identified as a major constituent in a metagenome from a deep subsurface oil reservoir with *in*  
456 *situ* temperature of 85°C and pressure of 25MPa (46). While the reservoir temperature is higher  
457 than the maximum *K. olearia* growth temperature reported here, elevated pressure could extend  
458 *K. olearia*'s temperature maximum, as has been demonstrated for some Archaea (e.g. (1)).  
459 Therefore, *K. olearia*'s growth temperature range under natural conditions may be even broader  
460 than 20-79°C.

461 **Concluding Remarks.** The present study demonstrates that a bacterium with a relatively  
462 small genome can use transcriptional changes to respond effectively to large changes in

463 temperature. We showed that *K. olearia*'s response to sustained exposure to a non-optimal  
464 temperature includes up-regulation of hundreds of genes. A substantial fraction of these genes  
465 have been acquired laterally, suggesting that LGT is an evolutionarily successful strategy for  
466 expansion of temperature tolerance; however, gene duplication and subsequent sub-  
467 functionalization of the paralogs also plays an important adaptive role.

468         The ability of *K. olearia* to inhabit both high and low temperature environments suggests  
469 that members of this lineage encounter environments with large temperature fluctuations and/or  
470 frequently migrate across ecological niches within the deep biosphere (e.g., between deep and  
471 shallow subsurface oil reservoirs). Therefore, the subsurface environments, as well as their  
472 microbial populations, might be viewed as a connected archipelago instead of isolated islands.  
473 As a corollary, we speculate that *K. olearia*-like ecological generalists could also facilitate LGT  
474 among seemingly isolated deep biosphere microbial communities adapted to a narrower  
475 ecological niche. For example, we have previously demonstrated high levels of gene flow among  
476 hyperthermophilic *Thermotoga* populations in subsurface oil reservoirs and marine hydrothermal  
477 vents (47), environments that are separated by non-thermophilic surroundings. The mechanism  
478 of such gene flow is not yet known, but *K. olearia*-like Thermotogae capable of growing both in  
479 subsurface oil reservoirs and adjacent marine sediments could serve as mediators of gene  
480 exchange.

481         Although some of the identified 573 temperature-responsive genes are already known to  
482 be expressed in Bacteria and Archaea grown at high or low temperatures, most of the up-  
483 regulated genes have not previously been implicated in temperature response and are in need of  
484 better functional and biochemical characterization. For example, the majority of the *K. olearia*  
485 genes responsive to elevated temperature encode proteins of unknown functions. Versatile

486 proteins that work across a broad range of temperatures also warrant further biochemical and  
487 evolutionary analyses, as understanding of their enzymatic flexibility can aid the design of  
488 commercially important thermostable proteins.

489

## 490 **Materials and Methods**

491 **Bacterial culturing, and RNA and DNA isolation.** *K. olearia* was grown at different  
492 temperatures (4°C, 25°C, 30°C, 40°C, 65°C, and 77°C), but otherwise optimal conditions, as  
493 described in (6) and Text S1 in the supplemental material.

494 For each temperature treatment, RNA was extracted in either mid-log phase or late-log  
495 phase, using the Zymo Research Fungal/Bacterial RNA MiniPrep Kit (Cedarlane Laboratories,  
496 Ltd.; Burlington, Ontario) and following the manufacturer's protocols (Table S1 in Dataset S1 in  
497 the supplemental material). The extracted RNA was sequenced on either an Ion Torrent PGM  
498 (RNA-Seq kit V2) or an Illumina MiSeq (TruSeq RNASeq v2 2x100 bp) from the libraries  
499 constructed following the manufacturer's instructions (Table S1 in Dataset S1 in the  
500 supplemental material). The transcriptomes are available in the Sequence Read Archive  
501 (<http://www.ncbi.nlm.nih.gov/sra>) under the accession number SRP075860.

502 **RNA-Seq analysis.** For each transcriptome, sequenced reads were analyzed using the  
503 RNA-Seq module in CLC Genomics Workbench version 7.0.4 (<http://www.clcbio.com/>, CLC  
504 bio, Århus, Denmark), resulting in RPKM (Reads Per Kilobase of transcript per Million mapped  
505 reads) values for each gene, as described in *SI Materials and Methods*. RPKM values for all  
506 genes are listed in Table S4 in Dataset S1 in the supplemental material. Differentially expressed  
507 genes were identified by doing pairwise comparisons of the transcriptomes of the isothermally  
508 grown cultures at 30°C, 40°C, and 77°C to the cultures grown at the optimal temperature of

509 65°C. The analyses used the “Empirical Analysis of DGE” function, which employs the “Exact  
510 Test” for two-group comparisons (48). A gene was considered differentially expressed in a  
511 pairwise comparison if it had (i) > 20 reads in at least one of the two transcriptomes, (ii) a  
512 statistically significant difference in the RPKM values (corrected for multiple testing using False  
513 Discovery Rate [FDR] < 0.05), and (iii) a difference in RPKM values at least two-fold in  
514 magnitude. Principal Component Analysis (PCA) and biplot visualization were performed using  
515 R packages *ade4* and *bpca* respectively (49, 50). Transcription start and stop sites and number of  
516 transcripts were predicted using Rockhopper (51). For detailed descriptions see Text S1 in the  
517 supplemental material.

518 **Comparative analyses of three *Kosmotoga* spp. genomes.** The genome of *K. olearia*  
519 (accession number CP001634, (15)) was compared to genomes of *Kosmotoga* sp. DU53  
520 (accession number JFHK00000000) and *K. arenicorallina* (accession number JGCK000000000)  
521 (38) using the IMG portal (52) and Geneious v.9. Pairwise Average Nucleotide Identity (ANI)  
522 (53) was calculated using the Enveomics Toolbox (54). Protein-coding genes in each genome  
523 were classified as putatively laterally transferred using a customized version of HGTector (39).  
524 For detailed descriptions see Text S1 in the supplemental material.

525 **Data availability:** The transcriptomics data is available in NCBI's Public Sequence Read  
526 Archive (SRA) database under the accession number SRP075860.

527

## 528 **Funding information**

529 This work was supported by a Research council of Norway award (project no. 180444/V40) to  
530 C.L.N.; a Simons Investigator award from the Simons Foundation, a Dartmouth College Walter



531 and Constance Burke Research Initiation Award, and Dartmouth College start-up funds to O.Z.;  
532 and an NSERC Alexander Graham Bell Canada Graduate Scholarship CGS-M to S.M.J.P. The  
533 funders had no role in study design, data collection and interpretation, or the decision to submit  
534 the work for publication.

535

### 536 **Acknowledgements**

537 We thank Rhianna Charchuk for technical assistance, Dr. Amanda J. Lohan for advice and  
538 discussion of RNA-Seq methodology, Dr. Karen Budwill for head-space gas analyses, and  
539 Jennifer Franks for initial discussions of lateral gene transfer detection methods.

540

### 541 **References**

- 542 1. **Takai, K, Nakamura, K, Toki, T, Tsunogai, U, Miyazaki, M, Miyazaki, J, Hirayama, H,**  
543 **Nakagawa, S, Nunoura, T, Horikoshi, K.** 2008. Cell proliferation at 122°C and isotopically  
544 heavy CH<sub>4</sub> production by a hyperthermophilic methanogen under high-pressure cultivation. Proc.  
545 Natl. Acad. Sci. U. S. A. **105**:10949-10954. doi: 10.1073/pnas.0712334105.
- 546 2. **Mykytczuk, NCS, Foote, SJ, Omelon, CR, Southam, G, Greer, CW, Whyte, LG.** 2013.  
547 Bacterial growth at -15°C; molecular insights from the permafrost bacterium *Planococcus*  
548 *halocryophilus* Or1. The ISME Journal. **7**:1211-1226. doi: 10.1038/ismej.2013.8.
- 549 3. **Schumann, W.** 2009. Temperature sensors of eubacteria. Advances in Applied Microbiology.  
550 **67**:213-256. doi: 10.1016/S0065-2164(08)01007-1.

- 551 4. **Raghubeer, EV, Matches, JR.** 1990. Temperature range for growth of *Escherichia*  
552 *coli* serotype 0157:H7 and selected coliforms in *E. coli* medium. *J. Clin. Microbiol.* **28**:803-805.
- 553 5. **Dinsdale, AE, Halket, G, Coorevits, A, van Landschoot, A, Busse, HJ, de Vos, P, Logan,**  
554 **NA.** 2011. Emended descriptions of *Geobacillus thermoleovorans* and *Geobacillus*  
555 *thermocatenulatus*. *Int. J. Syst. Evol. Microbiol.* **61**:1802-1810. doi: 10.1099/ijms.0.025445-0.
- 556 6. **DiPippo, JL, Nesbø, CL, Dahle, H, Doolittle, WF, Birkland, N, Noll, KM.** 2009.  
557 *Kosmotoga olearia* gen. nov., sp. nov., a thermophilic, anaerobic heterotroph isolated from an oil  
558 production fluid. *Int. J. Syst. Evol. Microbiol.* **59**:2991-3000. doi: 10.1099/ijms.0.008045-0.
- 559 7. **Barria, C, Malecki, M, Arraiano, CM.** 2013. Bacterial adaptation to cold. *Microbiology.*  
560 **159**:2437-2443. doi: 10.1099/mic.0.052209-0.
- 561 8. **Pollo, SMJ, Zhaxybayeva, O, Nesbø, CL.** 2015. Insights into thermoadaptation and the  
562 evolution of mesophily from the bacterial phylum *Thermotogae*. *Can. J. Microbiol.* **61**:655-670.
- 563 9. **Pysz, MA, Ward, DE, Shockley, KR, Montero, CI, Conners, SB, Johnson, MR, Kelly,**  
564 **RM.** 2004. Transcriptional analysis of dynamic heat-shock response by the hyperthermophilic  
565 bacterium *Thermotoga maritima*. *Extremophiles.* **8**:209-217. doi: 10.1007/s00792-004-0379-2.
- 566 10. **Wang, Z, Tong, W, Wang, Q, Bai, X, Chen, Z, Zhao, J, Xu, N, Liu, S.** 2012. The  
567 temperature dependent proteomic analysis of *Thermotoga maritima*. *PloS One.* **7**:e46463. doi:  
568 10.1371/journal.pone.0046463.
- 569 11. **Phadtare, S.** 2004. Recent developments in bacterial cold-shock response. *Curr. Issues Mol.*  
570 *Biol.* **6**:125-136.

- 571 12. **Phadtare, S, Hwang, J, Severinov, K, Inouye, M.** 2003. CspB and CspL, thermostable  
572 cold-shock proteins from *Thermotoga maritima*. *Genes to Cells*. **8**:801-810. doi: 10.1046/j.1365-  
573 2443.2003.00675.x.
- 574 13. **Boonyaratanakornkit, BB, Simpson, AJ, Whitehead, TA, Fraser, CM, El-Sayed, NMA,**  
575 **Clark, DS.** 2005. Transcriptional profiling of the hyperthermophilic methanarchaeon  
576 *Methanococcus jannaschii* in response to lethal heat and non-lethal cold shock. *Environ.*  
577 *Microbiol.* **7**:789-797. doi: 10.1111/j.1462-2920.2005.00751.x.
- 578 14. **Mega, R, Manzoku, M, Shinkai, A, Nakagawa, N, Kuramitsu, S, Masui, R.** 2010. Very  
579 rapid induction of a cold shock protein by temperature downshift in *Thermus thermophilus*.  
580 *Biochem. Biophys. Res. Commun.* **399**:336-340. doi: 10.1016/j.bbrc.2010.07.065.
- 581 15. **Swithers, KS, DiPippo, JL, Bruce, DC, Detter, C, Tapia, R, Han, S, Goodwin, LA, Han,**  
582 **J, Woyke, T, Pitluck, S, Pennacchio, L, Nolan, M, Mikhailova, N, Land, ML, Nesbø, CL,**  
583 **Gogarten, JP, Noll, KM.** 2011. Genome sequence of *Kosmotoga olearia* strain TBF 19.5.1, a  
584 thermophilic bacterium with a wide growth temperature range, isolated from the Troll B oil  
585 platform in the North Sea. *J. Bacteriol.* **193**:5566-5567. doi: 10.1128/JB.05828-11.
- 586 16. **Zhaxybayeva, O, Swithers, KS, Foght, J, Green, AG, Bruce, D, Detter, C, Han, S,**  
587 **Teshima, H, Han, J, Woyke, T, Pitluck, S, Nolan, M, Ivanova, N, Pati, A, Land, ML,**  
588 **Dlutek, M, Doolittle, WF, Noll, KM, Nesbø, CL.** 2012. Genome sequence of the mesophilic  
589 Thermotogales bacterium *Mesotoga prima* MesG1.Ag.4.2 reveals the largest Thermotogales  
590 genome to date. *Genome Biol. Evol.* **4**:700-708. doi: 10.1093/gbe/evs059.

- 591 17. **Zhaxybayeva, O, Swithers, KS, Lapierre, P, Fournier, GP, Bickhart, DM, DeBoy, RT,**  
592 **Nelson, KE, Nesbø, CL, Doolittle, WF, Gogarten, JP, Noll, KM.** 2009. On the chimeric  
593 nature, thermophilic origin, and phylogenetic placement of the *Thermotogales*. Proc. Natl. Acad.  
594 Sci. U. S. A. **106**:5865-5870. doi: 10.1073/pnas.0901260106.
- 595 18. **Boucher, Y, Douady, CJ, Papke, RT, Walsh, DA, Boudreau, MER, Nesbø, CL, Case,**  
596 **RJ, Doolittle, WF.** 2003. Lateral gene transfer and the origins of prokaryotic groups. Annu. Rev.  
597 Genet. **37**:283-328. doi: 10.1146/annurev.genet.37.050503.084247.
- 598 19. **López-García, P, Zivanovic, Y, Deschamps, P, Moreira, D.** 2015. Bacterial gene import  
599 and mesophilic adaptation in archaea. Nature Reviews.Microbiology. **13**:447-456. doi:  
600 10.1038/nrmicro3485.
- 601 20. **Ratkowsky, DA, Lowry, RK, McMeekin, TA, Stokes, AN, Chandler, RE.** 1983. Model  
602 for bacterial culture growth rate throughout the entire biokinetic temperature range. J. Bacteriol.  
603 **154**:1222-1226.
- 604 21. **Swinnen, IAM, Bernaerts, K, Dens, EJJ, Geeraerd, AH, Van Impe J. F.** 2004. Predictive  
605 modelling of the microbial lag phase: A review. Int. J. Food Microbiol. **94**:137-159. doi:  
606 10.1016/j.ijfoodmicro.2004.01.006.
- 607 22. **Latif, H, Lerman, JA, Portnoy, VA, Tarasova, Y, Nagarajan, H, Schrimpe-Rutledge,**  
608 **AC, Smith, RD, Adkins, JN, Lee, D, Qiu, Y, Zengler, K.** 2013. The genome organization of  
609 *Thermotoga maritima* reflects its lifestyle. PLoS Genetics. **9**:e1003485. doi:  
610 10.1371/journal.pgen.1003485.

- 611 23. **Cho, B, Zengler, K, Qiu, Y, Park, YS, Knight, EM, Barrett, CL, Gao, Y, Palsson, BØ.**  
612 2009. The transcription unit architecture of the *Escherichia coli* genome. Nat. Biotechnol.  
613 **27**:1043-1049. doi: 10.1038/nbt.1582.
- 614 24. **Qiu, Y, Cho, BK, Park, YS, Lovley, D, Palsson, B, Zengler, K.** 2010. Structural and  
615 operational complexity of the *Geobacter sulfurreducens* genome. Genome Res. **20**:1304-1311.  
616 doi: 10.1101/gr.107540.110.
- 617 25. **Nanavati, DM, Thirangoon, K, Noll, KM.** 2006. Several archaeal homologs of putative  
618 oligopeptide-binding proteins encoded by *Thermotoga maritima* bind sugars. Appl. Environ.  
619 Microbiol. **72**:1336-1345. doi: 10.1128/AEM.72.2.1336-1345.2006.
- 620 26. **Foster, PL.** 2007. Stress-induced mutagenesis in bacteria. Crit Rev Biochem Mol Biol.  
621 **42**:373-397. doi: 10.1080/10409230701648494.Stress-Induced.
- 622 27. **de Mendoza, D.** 2014. Temperature sensing by membranes. Annu. Rev. Microbiol. **68**:101-  
623 116. doi: 10.1146/annurev-micro-091313-103612.
- 624 28. **Godin-Roulling, A, Schmidpeter, PAM, Schmid, FX, Feller, G.** 2015. Functional  
625 adaptations of the bacterial chaperone trigger factor to extreme environmental temperatures.  
626 Environ. Microbiol. **17**:2407-2420. doi: 10.1111/1462-2920.12707.
- 627 29. **Alreshidi, MM, Dunstan, RH, Macdonald, MM, Smith, ND, Gottfries, J, Roberts, TK.**  
628 2015. Metabolomic and proteomic responses of *Staphylococcus aureus* to prolonged cold stress.  
629 Journal of Proteomics. **121**:44-55. doi: 10.1016/j.jprot.2015.03.010.

- 630 30. **Fox, GE.** 2010. Origin and evolution of the ribosome, p. 2:a003483. *In* D. Deamer and J. W.  
631 Szostak (eds.), *The Origins of Life*. Cold Spring Harb Perspect Biol.
- 632 31. **Akanuma, G, Kobayashi, A, Suzuki, S, Kawamura, F, Shiwa, Y, Watanabe, S,**  
633 **Yoshikawa, H, Hanai, R, Ishizuka, M.** 2014. Defect in the formation of 70S ribosomes caused  
634 by lack of ribosomal protein L34 can be suppressed by magnesium. *J. Bacteriol.* **196**:3820-3830.  
635 doi: 10.1128/JB.01896-14.
- 636 32. **Akanuma, G, Nanamiya, H, Natori, Y, Yano, K, Suzuki, S, Omata, S, Ishizuka, M,**  
637 **Sekine, Y, Kawamura, F.** 2012. Inactivation of ribosomal protein genes in *Bacillus subtilis*  
638 reveals importance of each ribosomal protein for cell proliferation and cell differentiation. *J.*  
639 *Bacteriol.* **194**:6282-6291. doi: 10.1128/JB.01544-12.
- 640 33. **Bhavsar, RB, Makley, LN, Tsonis, PA.** 2010. The other lives of ribosomal proteins. *Hum*  
641 *Genomics.* **4**:327-344. doi: 10.1186/1479-7364-4-5-327.
- 642 34. **Baldrige, KC, Contreras, LM.** 2014. Functional implications of ribosomal RNA  
643 methylation in response to environmental stress. *Crit. Rev. Biochem. Mol. Biol.* **49**:69-89. doi:  
644 10.3109/10409238.2013.859229.
- 645 35. **Dahlsten, E, Isokallio, M, Somervuo, P, Lindström, M, Korkeala, H.** 2014.  
646 Transcriptomic analysis of (group I) *Clostridium botulinum* ATCC 3502 cold shock response.  
647 *PloS One.* **9**:e89958. doi: 10.1371/journal.pone.0089958.

- 648 36. **Sakanaka, A, Kuboniwa, M, Takeuchi, H, Hashino, E, Amano, A.** 2015. Arginine-  
649 ornithine antiporter ArcD controls arginine metabolism and interspecies biofilm development of  
650 *Streptococcus gordonii*. J. Biol. Chem. **290**:21185-21198. doi: 10.1074/jbc.M115.644401.
- 651 37. **Ghobakhlou, A, Johnston, A, Harris, L, Antoun, H, Laberge, S.** 2015. Microarray  
652 transcriptional profiling of Arctic *Mesorhizobium* strain N33 at low temperature provides  
653 insights into cold adaption strategies. BMC Genomics. **16**:383-396. doi: 10.1186/s12864-015-  
654 1611-4.
- 655 38. **Pollo, SMJ, Charchuk, R, Nesbø, CL.** 2016. Draft genome sequences of *Kosmotoga* sp.  
656 DU53 and *Kosmotoga arenicorallina* S304. GenomeA. in press.
- 657 39. **Zhu, Q, Kosoy, M, Dittmar, K.** 2014. HGTector: An automated method facilitating  
658 genome-wide discovery of putative horizontal gene transfers. BMC Genomics. **15**:717. doi:  
659 10.1186/1471-2164-15-717.
- 660 40. **Piette, F, D'Amico, S, Struvay, C, Mazzucchelli, G, Renaut, J, Tutino, ML, Danchin, A,**  
661 **Leprince, P, Feller, G.** 2010. Proteomics of life at low temperatures: trigger factor is the  
662 primary chaperone in the Antarctic bacterium *Pseudoalteromonas haloplanktis* TAC125. Mol.  
663 Microbiol. **76**:120-132. doi: 10.1111/j.1365-2958.2010.07084.x.
- 664 41. **Graur, D.** 2016. Prokaryotic Genome Evolution, p. 451. In Anonymous Molecular and  
665 Genome Evolution. Sinauer Associates, Sunderland, MA.
- 666 42. **Sievert, S, Vetriani, C.** 2012. Chemoautotrophy at Deep-Sea Vents: Past, Present, and  
667 Future. Oceanography. **25**:218-233. doi: 10.5670/oceanog.2012.21.

- 668 43. Nunoura, T, Hirai, M, Imachi, H, Miyazaki, M, Makita, H, Hirayama, H, Furushima,  
669 Y, Yamamoto, H, Takai, K. 2010. *Kosmotoga arenicorallina* sp. nov. a thermophilic and  
670 obligately anaerobic heterotroph isolated from a shallow hydrothermal system occurring within a  
671 coral reef, southern part of the Yaeyama Archipelago, Japan, reclassification of  
672 *Thermococcoides shengliensis* as *Kosmotoga shengliensis* comb. nov., and emended description  
673 of the genus *Kosmotoga*. Arch. Microbiol. **192**:811-819. doi: 10.1007/s00203-010-0611-7.
- 674 44. L'Haridon, S, Jiang, L, Alain, K, Chalopin, M, Rouxel, O, Beauverger, M, Xu, H, Shao,  
675 Z, Jebbar, M. 2014. *Kosmotoga pacifica* sp. nov., a thermophilic chemoorganoheterotrophic  
676 bacterium isolated from an East Pacific hydrothermal sediment. Extremophiles. **18**:81-88. doi:  
677 10.1007/s00792-013-0596-7.
- 678 45. Nesbø, CL, Kumaraswamy, R, Dlutek, M, Doolittle, WF, Foght, J. 2010. Searching for  
679 mesophilic *Thermotogales* bacteria: "Mesotogas" in the wild. Appl. Environ. Microbiol.  
680 **76**:4896-4900. doi: 10.1128/AEM.02846-09.
- 681 46. Kotlar, HK, Lewin, A, Johansen, J, Throne-Holst, M, Haverkamp, T, Markussen, S,  
682 Winnberg, A, Ringrose, P, Aakvik, T, Ryeng, E, Jakobsen, K, Drabløs, F, Valla, S. 2011.  
683 High coverage sequencing of DNA from microorganisms living in an oil reservoir 2.5 kilometres  
684 subsurface. Environmental Microbiology Reports. **3**:674-681. doi: 10.1111/j.1758-  
685 2229.2011.00279.x.
- 686 47. Nesbø, CL, Swithers, KS, Dahle, H, Haverkamp, TH, Birkeland, N, Sokolova, T,  
687 Kublanov, I, Zhaxybayeva, O. 2015. Evidence for extensive gene flow and *Thermotoga*



- 688 subpopulations in subsurface and marine environments. *The ISME Journal*. **9**:1532-1542. doi:  
689 10.1038/ismej.2014.238.
- 690 48. **Robinson, MD, Smyth, GK**. 2008. Small-sample estimation of negative binomial  
691 dispersion, with applications to SAGE data. *Biostatistics*. **9**:321-332. doi:  
692 10.1093/biostatistics/kxm030.
- 693 49. **Dray, S, Dufour, AB, Chessel, D**. 2007. The ade4 Package - II : Two-table and K-table  
694 methods. *R News*. **7**:47-52. doi: 10.1159/000323281.
- 695 50. **Faria, JC, Demétrio, CGB, Allaman, IB**. 2013. bPCA: Biplot of multivariate data based on  
696 principal components analysis. UESC and ESALQ, Ilheus, Bahia, Brasil and Piracicaba, Sao  
697 Paulo, Brasil.
- 698 51. **McClure, R, Balasubramanian, D, Sun, Y, Bobrovskyy, M, Sumby, P, Genco, Ca,**  
699 **Vanderpool, CK, Tjaden, B**. 2013. Computational analysis of bacterial RNA-Seq data. *Nucleic*  
700 *Acids Res*. **41**:e140. doi: 10.1093/nar/gkt444.
- 701 52. **Markowitz, VM, Chen, IA, Palaniappan, K, Chu, K, Szeto, E, Pillay, M, Ratner, A,**  
702 **Huang, J, Woyke, T, Huntemann, M, Anderson, I, Billis, K, Varghese, N, Mavromatis, K,**  
703 **Pati, A, Ivanova, NN, Kyrpides, NC**. 2014. IMG 4 version of the integrated microbial genomes  
704 comparative analysis system. *Nucleic Acids Res*. **42**:D560-7. doi: 10.1093/nar/gkt963.
- 705 53. **Goris, J, Konstantinidis, KT, Klappenbach, JA, Coenye, T, Vandamme, P, Tiedje, JM**.  
706 2007. DNA-DNA hybridization values and their relationship to whole-genome sequence  
707 similarities. *Int. J. Syst. Evol. Microbiol*. **57**:81-91. doi: 10.1099/ijs.0.64483-0.

708 54. **Rodriguez-R, LM, Konstantinidis, KT.** 2016. The enveomics collection: a toolbox for  
709 specialized analyses of microbial genomes and metagenomes. Peer J Preprints. **4**:e19001.

710

711

712 **Figure Legends:**

713 **FIG 1. Growth rate of *K. olearia* as a function of temperature.** Isothermic growth curves were  
714 generated at each temperature from an inoculum grown at that temperature for at least three  
715 transfers (except for 25°C and 80°C, for which an inoculum from the same temperature could not  
716 be generated; see Text S1 in the supplemental material.). Up-shifted and down-shifted growth  
717 curves were generated from an inoculum that was grown at lower and higher temperatures,  
718 respectively. Red squares, growth temperature up-shifted from 65°C to 77°C or from 40°C to  
719 65°C; Blue circles, growth temperature down-shifted from 77°C to 65°C, 65°C to 40°C, or 40°C  
720 to 30°C. Data points represent the mean of replicate cultures (see Text S1 in the supplemental  
721 material); error bars represent standard error.

722

723 **FIG 2. Model of energy generation pathway in *K. olearia* during growth on pyruvate.** The  
724 model includes genes likely involved in conversion of pyruvate to acetate, CO<sub>2</sub>, H<sub>2</sub>, and ATP.  
725 The genes were selected from the list of genes highly expressed across all temperature conditions  
726 (Table S3 in Dataset S1 in the supplemental material). Acetate transport is not shown. The  
727 dashed box indicates hydrogenase activity. The two highly expressed hydrogenases are shown,  
728 but their potential interactions with each other or with the membrane are not known. Increased  
729 expression of citrate synthase at low temperature, which could redirect acetyl-CoA away from  
730 acetate production, is shown in grey. The model also explains the observed lower ratio of carbon  
731 dioxide to hydrogen produced by growth on maltose vs. pyruvate (not shown), as during growth  
732 on maltose reduced electron carriers would be generated from the conversions of maltose to  
733 pyruvate.

734

735 **FIG 3. Biplot of the principal component analysis of 12 transcriptomes.** Each transcriptome  
736 is denoted by a point, while genes are represented by vectors. Genes that point into a specific  
737 "temperature quadrant" are up-regulated at the growth temperature(s) of that quadrant, and the  
738 five longest (i.e., most highly correlated) gene vectors pointing to each quadrant are shown. Co-  
739 ordinates and vector length for all genes can be found in Table S4 in Dataset S1 in the  
740 supplemental material. It should be noted that the *ffs* (Kole\_R0010) transcript is only 115 nt, and  
741 may not have been fully represented in every transcriptome due to our isolation protocol which  
742 selects against small RNA (<200 nucleotides). Also, the high expression of the alcohol  
743 dehydrogenase (Kole\_0742) is probably due to the RNA isolation method (see Text S1 in the  
744 supplemental material.).

745

746 **FIG 4. Difference between observed and expected number of temperature responsive genes**  
747 **across functional categories.** Functional categories were assigned using the Clusters of  
748 Orthologous Groups (COG) database as implemented in IMG (52) and are denoted by one-letter  
749 abbreviations along the X-axis (see Fig. S3 legend for notations). NC, for "no category", denotes  
750 genes not assigned to a functional category. For each temperature treatment (30°C, 40°C and  
751 77°C) only the temperature-responsive fraction of the *K. olearia* genome was considered. If the  
752 temperature-responsive genes were randomly distributed across functional categories we would  
753 expect the same fraction of temperature-responsive genes in each COG category. The difference  
754 (in percent) between the observed and expected number of temperature responsive genes is  
755 plotted on the Y-axis with positive and negative values referring to over- and under-

756 representation of the temperature-responsive genes, respectively. For actual number of genes in  
757 each COG category see Fig. S3 in the supplemental material.

758

759

760 **TABLE 1. Gene expression in selected laterally acquired temperature-responsive genes.** At each  
 761 temperature, the listed RPKM values represent the average expression levels across replicates. Values that  
 762 are significantly different from 65°C are shown in bold font.

| Locus Tag | Functional annotation                              | 30°C <sup>a</sup> | 40°C        | 65°C | 77°C       | Identified by         |
|-----------|----------------------------------------------------|-------------------|-------------|------|------------|-----------------------|
| Kole_0109 | Cold shock protein                                 | <b>5602</b>       | <b>892</b>  | 222  | 119        | Phylogenetic analysis |
| Kole_0110 | Histidine kinase                                   | 175               | <b>333</b>  | 144  | 312        | Phylogenetic analysis |
| Kole_0111 | Response regulator                                 | 166               | 204         | 173  | <b>446</b> | HGTector              |
| Kole_0505 | Glycerol dehydrogenase                             | 721               | <b>2668</b> | 752  | 1242       | HGTector              |
| Kole_0506 | Hypothetical protein                               | 559               | <b>2037</b> | 461  | 783        | Phylogenetic analysis |
| Kole_0507 | Hypothetical protein                               | 555               | <b>2193</b> | 521  | 809        | HGTector              |
| Kole_0508 | Poly (3-hydroxybutyrate) depolymerase-like protein | 212               | 423         | 200  | 314        | HGTector              |
| Kole_0897 | Ribosomal RNA methyltransferase, rmlL              | <b>503</b>        | 498         | 228  | 232        | HGTector              |
| Kole_0922 | DEAD/DEAH box helicase                             | <b>755</b>        | <b>288</b>  | 89   | 102        | HGTector              |
| Kole_0969 | 3-oxoacyl-ACP synthase III , FabH                  | <b>2386</b>       | <b>3063</b> | 939  | 1424       | HGTector              |
| Kole_0970 | enoyl-ACP reductase II , fabK                      | 2226              | 3243        | 1486 | 1641       | HGTector              |

|           |                                                     |             |            |      |            |                       |
|-----------|-----------------------------------------------------|-------------|------------|------|------------|-----------------------|
| Kole_0971 | malonyl CoA-acyl carrier protein transacylase, fabD | 2304        | 4211       | 2303 | 2647       | HGTector              |
| Kole_0972 | acyl carrier protein                                | 6531        | 12601      | 4850 | 4241       | HGTector              |
| Kole_0973 | 3-oxoacyl-ACP synthase II, fabF                     | 4815        | 9257       | 4753 | 4498       | HGTector              |
| Kole_1015 | Response regulator                                  | <b>1289</b> | <b>515</b> | 95   | 130        | HGTector              |
| Kole_1016 | Response regulator                                  | <b>783</b>  | <b>280</b> | 54   | 72         | HGTector              |
| Kole_1017 | Histidine kinase                                    | <b>697</b>  | <b>275</b> | 59   | 90         | Phylogenetic analysis |
| Kole_1281 | N-acylneuraminate-9-phosphate synthase              | 482         | 699        | 315  | <b>840</b> | HGTector              |
| Kole_1282 | N-acylneuraminate cytidyltransferase                | 244         | <b>283</b> | 128  | <b>315</b> | Phylogenetic analysis |
| Kole_1718 | Ribosomal RNA methyltransferase, rmlH               | <b>531</b>  | 332        | 211  | 203        | HGTector              |
| Kole_1745 | PPIase FKBP-type                                    | 2783        | 2382       | 1541 | <b>430</b> | HGTector              |

763

764

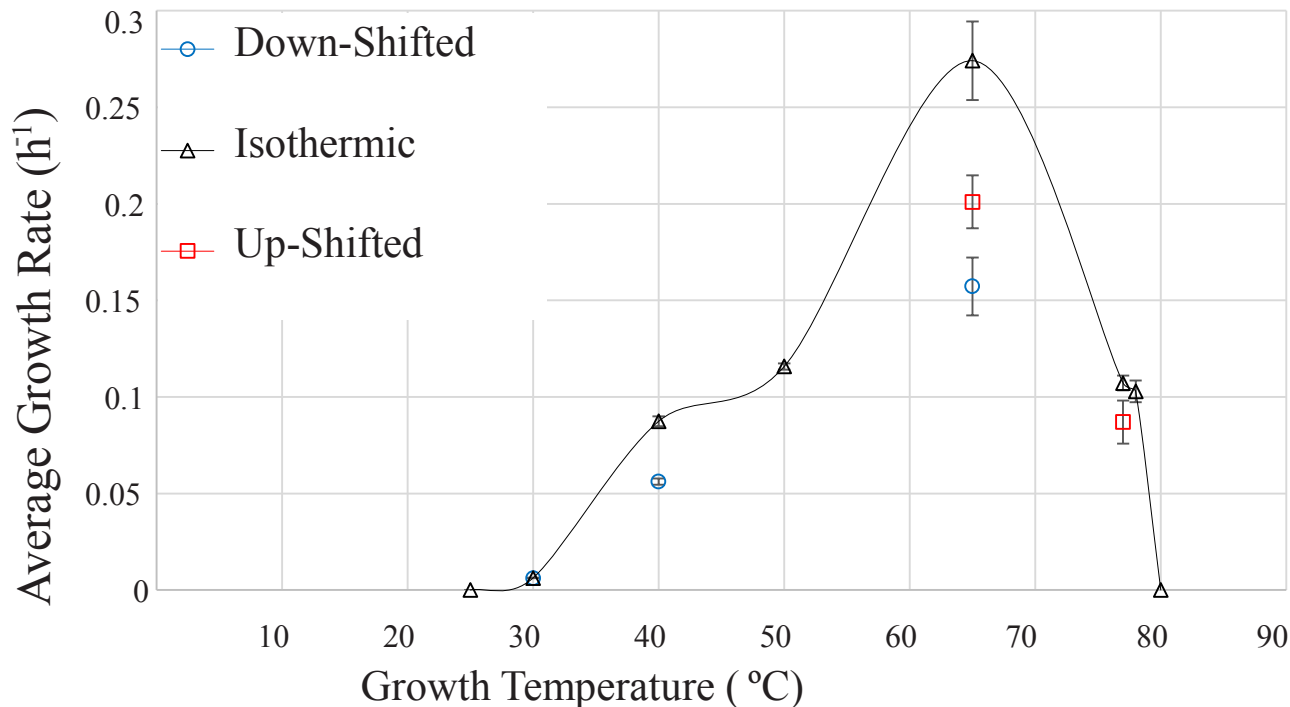

FIG 1. Growth rate of *K. olearia* as a function of temperature. Isothermic growth curves were generated at each temperature from an inoculum grown at that temperature for at least three transfers (except for 25°C and 80°C, for which an inoculum from the same temperature could not be generated; see Text S1 in the supplemental material.). Up-shifted and down-shifted growth curves were generated from an inoculum that was grown at lower and higher temperatures, respectively. Red squares, growth temperature up-shifted from 65°C to 77°C or from 40°C to 65°C; Blue circles, growth temperature down-shifted from 77°C to 65°C, 65°C to 40°C, or 40°C to 30°C. Data points represent the mean of replicate cultures (see Text S1 in the supplemental material); error bars represent standard error.



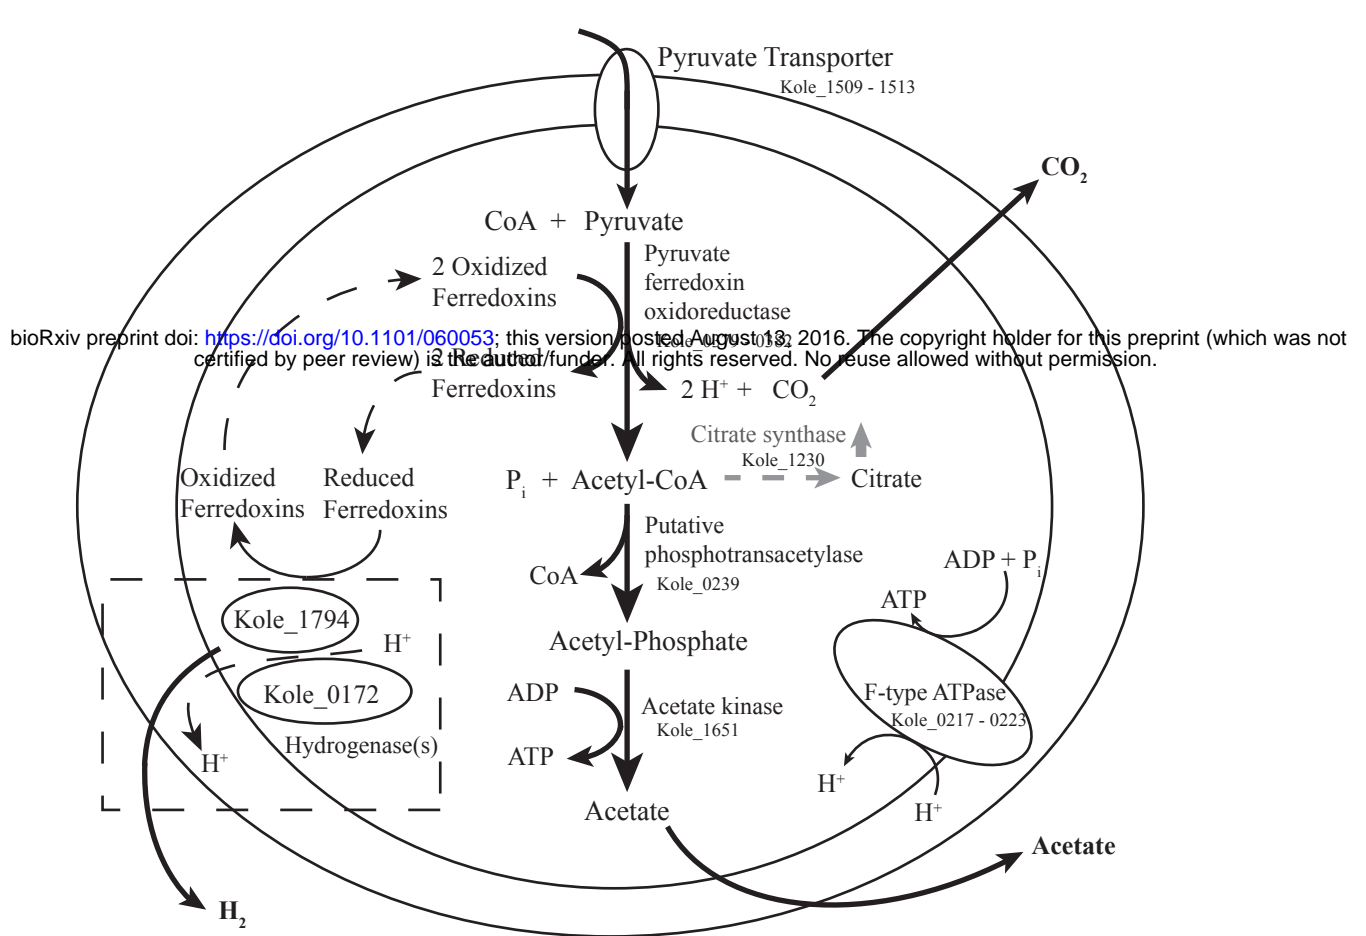

FIG 2. Model of energy generation pathway in *K. olearia* during growth on pyruvate. The model includes genes likely involved in conversion of pyruvate to acetate,  $\text{CO}_2$ ,  $\text{H}_2$ , and ATP. The genes were selected from the list of genes highly expressed across all temperature conditions (Table S3 in Dataset S1 in the supplemental material). Acetate transport is not shown. The dashed box indicates hydrogenase activity. The two highly expressed hydrogenases are shown, but their potential interactions with each other or with the membrane are not known. Increased expression of citrate synthase at low temperature, which could redirect acetyl-CoA away from acetate production, is shown in grey. The model also explains the observed lower ratio of carbon dioxide to hydrogen produced by growth on maltose vs. pyruvate (not shown), as during growth on maltose reduced electron carriers would be generated from the conversions of maltose to pyruvate.

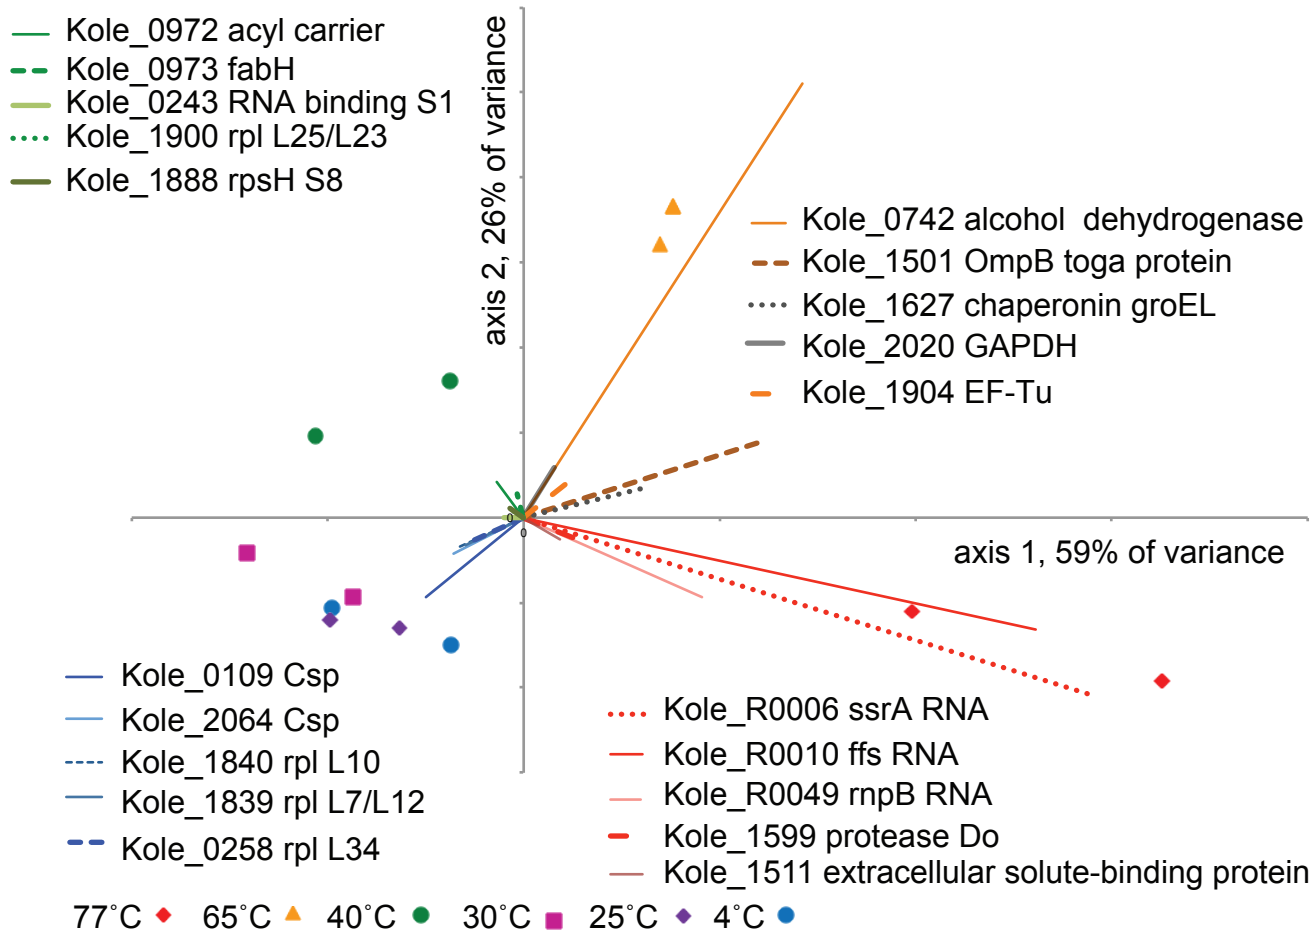

FIG 3. Biplot of the principal component analysis of 12 transcriptomes. Each transcriptome is denoted by a point, while genes are represented by vectors. Genes that point into a specific "temperature quadrant" are up-regulated at the growth temperature(s) of that quadrant, and the five longest (i.e., most highly correlated) gene vectors pointing to each quadrant are shown. Co-ordinates and vector length for all genes can be found in Table S4 in Dataset S1 in the supplemental material. It should be noted that the ffs (Kole\_R0010) transcript is only 115 nt, and may not have been fully represented in every transcriptome due to our isolation protocol which selects against small RNA (<200 nucleotides). Also, the high expression of the alcohol dehydrogenase (Kole\_0742) is probably due to the RNA isolation method (see Text S1 in the supplemental material.).

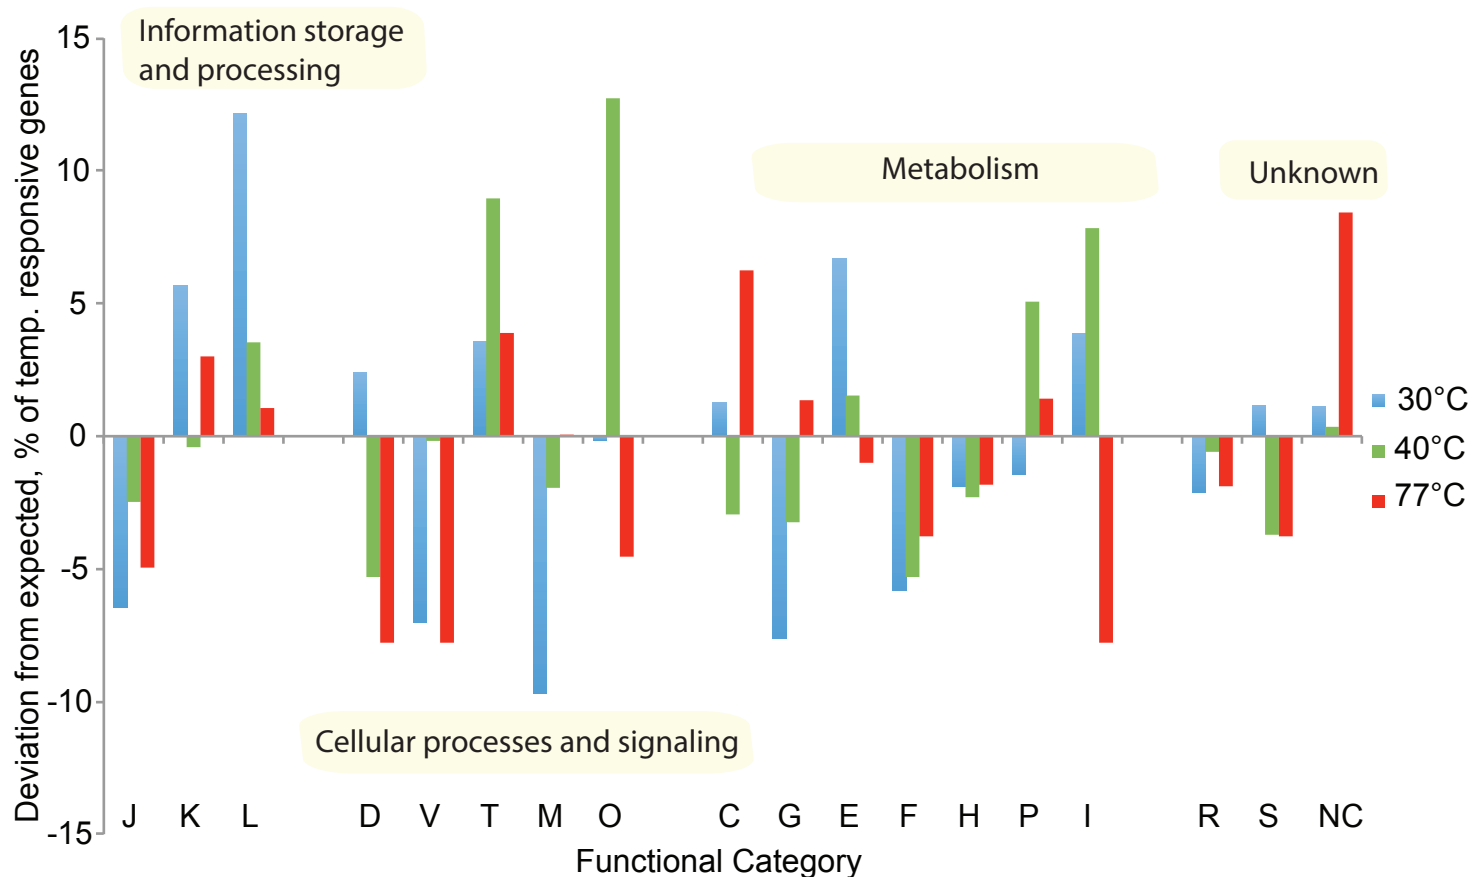

FIG 4. Difference between observed and expected number of temperature responsive genes across functional categories. Functional categories were assigned using the Clusters of Orthologous Groups (COG) database as implemented in IMG (52) and are denoted by one-letter abbreviations along the X-axis (see Fig. S3 legend for notations). NC, for "no category", denotes genes not assigned to a functional category. For each temperature treatment (30°C, 40°C and 77°C) only the temperature-responsive fraction of the *K. olearia* genome was considered. If the temperature-responsive genes were randomly distributed across functional categories we would expect the same fraction of temperature-responsive genes in each COG category. The difference (in percent) between the observed and expected number of temperature responsive genes is plotted on the Y-axis with positive and negative values referring to over- and under-representation of the temperature-responsive genes, respectively. For actual number of genes in each COG category see Fig. S3 in the supplemental material.
